# Supplementary material
Source: publisher figshare collection journal article supplement (https://acs.figshare.com/ndownloader/files/3793087)
Supplement: Supplementary file 1 [file 3793087]

## ***Supporting Information***

### **Antifouling Coatings of Catecholamine Copolymers on Stainless Steel**

Li Qun Xu<sup>1</sup>, Dicky Pranantyo<sup>1</sup>, Ying Xian Ng<sup>2</sup>, Serena Lay-Ming Teo<sup>2\*</sup>,  
Koon-Gee Neoh<sup>1</sup>, En-Tang Kang<sup>1\*</sup>, Guo Dong Fu<sup>3</sup>

<sup>1</sup> Department of Chemical & Biomolecular Engineering  
National University of Singapore  
Kent Ridge, Singapore 117576

<sup>2</sup> Tropical Marine Science Institute  
National University of Singapore  
Kent Ridge, Singapore 119223

<sup>3</sup> School of Chemistry and Chemical Engineering  
Southeast University  
Jiangning District, Nanjing, Jiangsu Province, P.R. China 211189

\* To whom correspondence should be addressed:

E-mails: cheket@nus.edu.sg (ETK); tmsteolm@nus.edu.sg (SLMT)

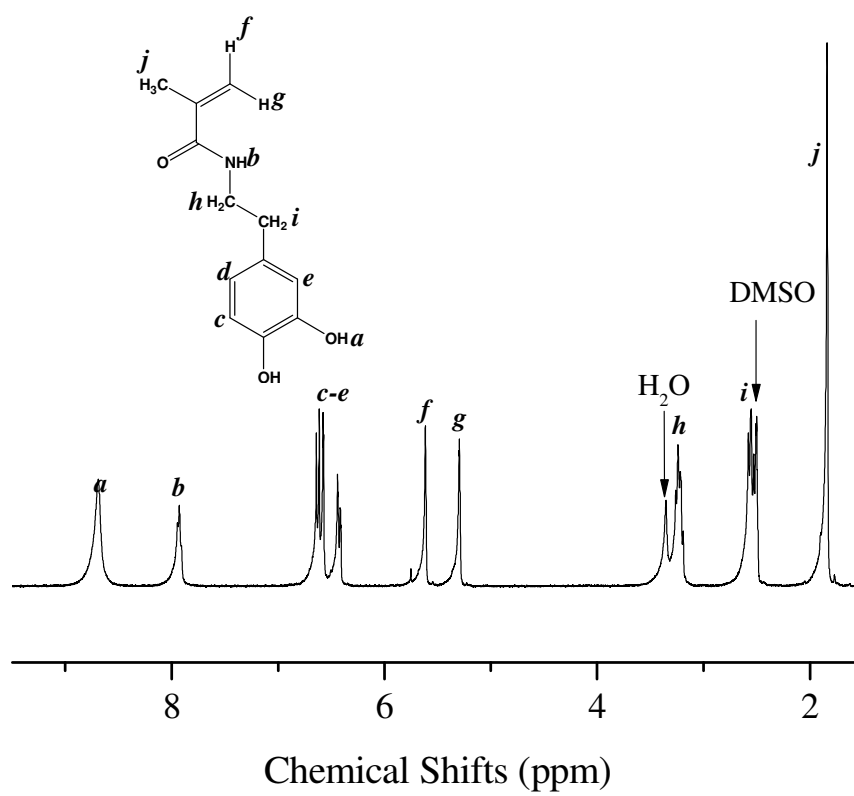

**Figure S1.**  $^1\text{H}$  NMR spectrum of DMA in  $\text{DMSO}-d_6$ .

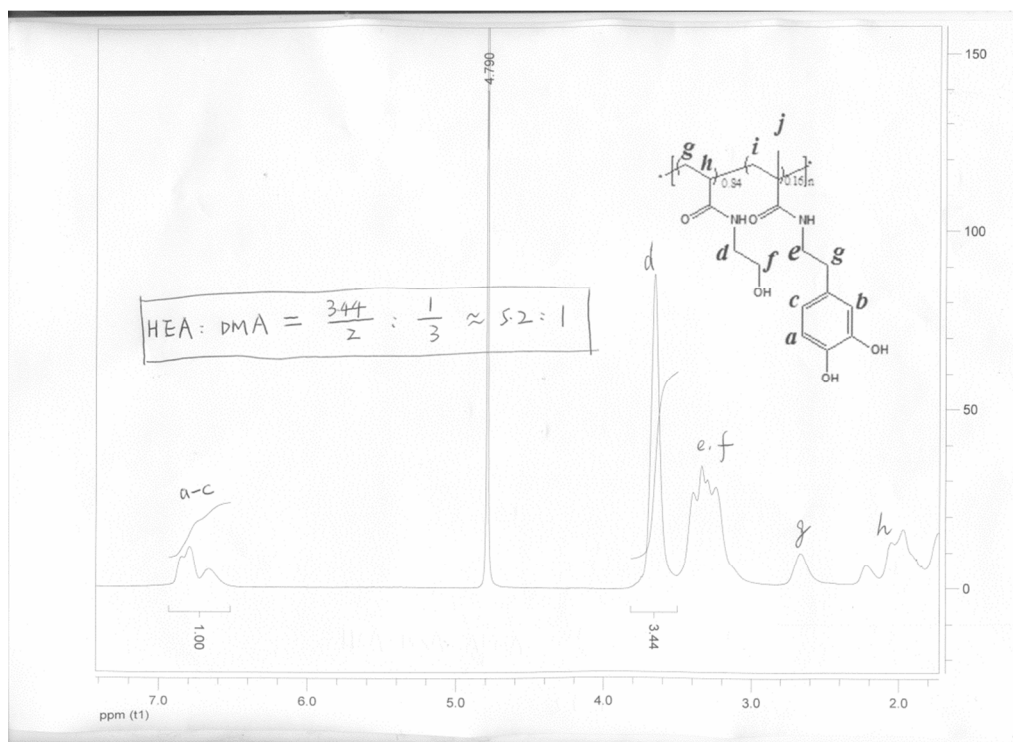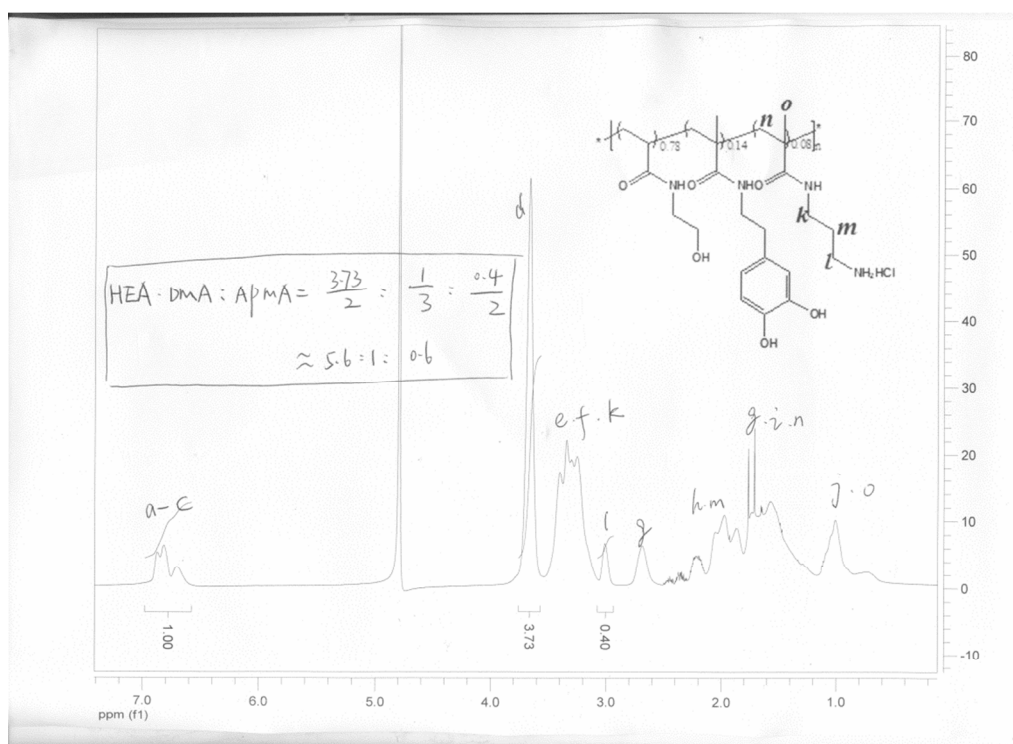

**Figure S2.**  $^1\text{H}$  NMR spectra of the P(HEA-co-DMA) copolymers and the P(HEA-co-DMA-co-APMA) terpolymers in  $\text{D}_2\text{O}$ .



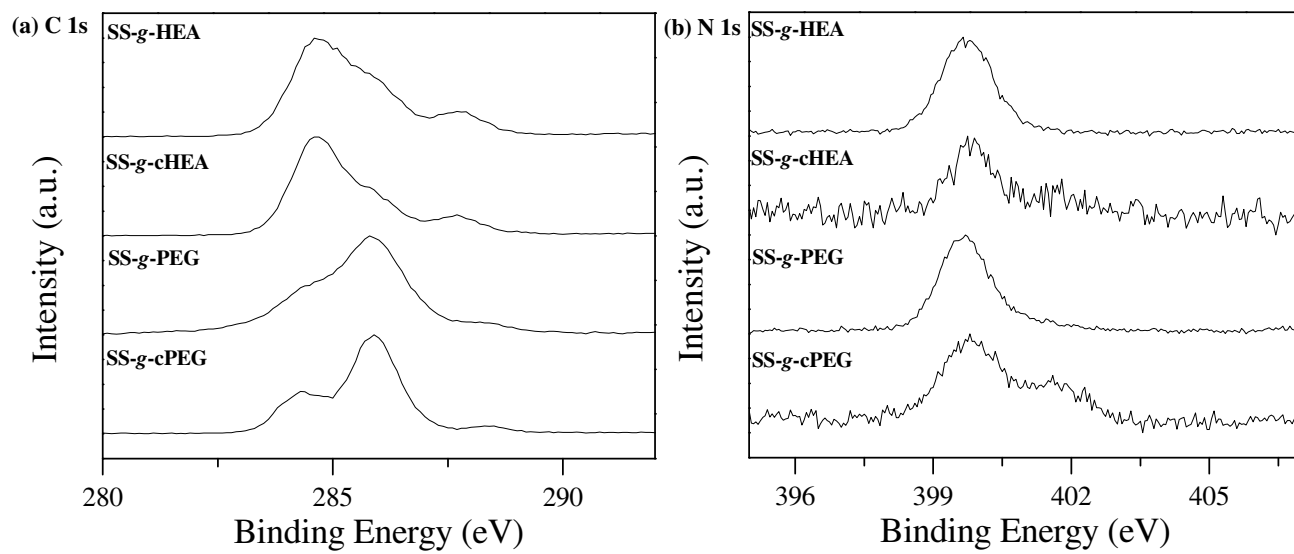

**Figure S4.** XPS (a) C 1s and (b) N 1s core-level spectra of the P(HEA-*co*-DMA) and P(PEGMEMA-*co*-DMA) copolymers- and the P(HEA-*co*-DMA-*co*-APMA) and P(PEGMEMA-*co*-DMA-*co*-APMA) terpolymers-coated SS surfaces.

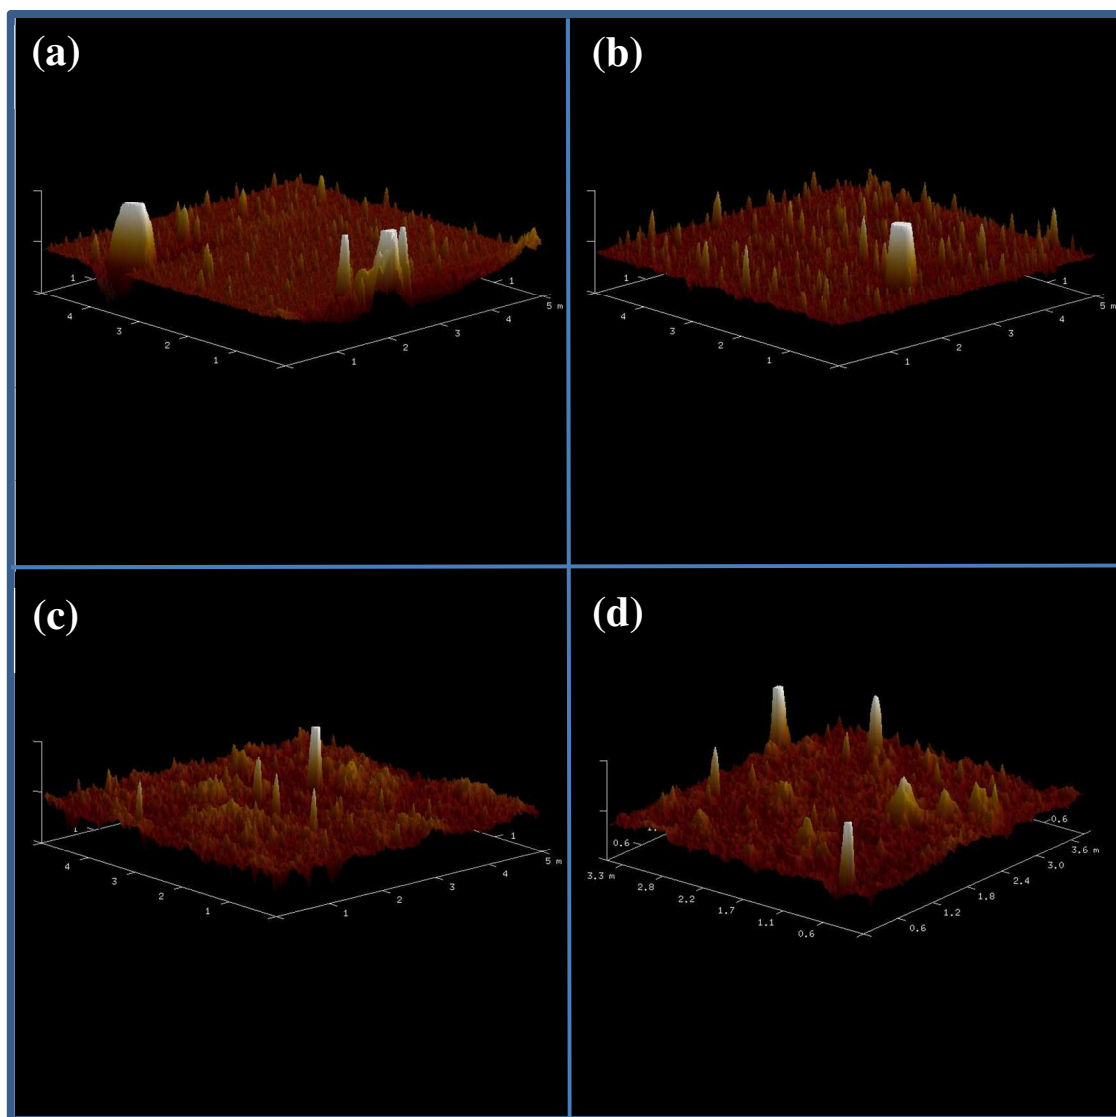

**Figure S5.** AFM images of the surface of the (a) P(HEA-*co*-DMA) and (b) P(PEGMEMA-*co*-DMA) copolymers- and the (c) P(HEA-*co*-DMA-*co*-APMA) and (d) P(PEGMEMA-*co*-DMA-*co*-APMA) terpolymers-coated quartz slides.

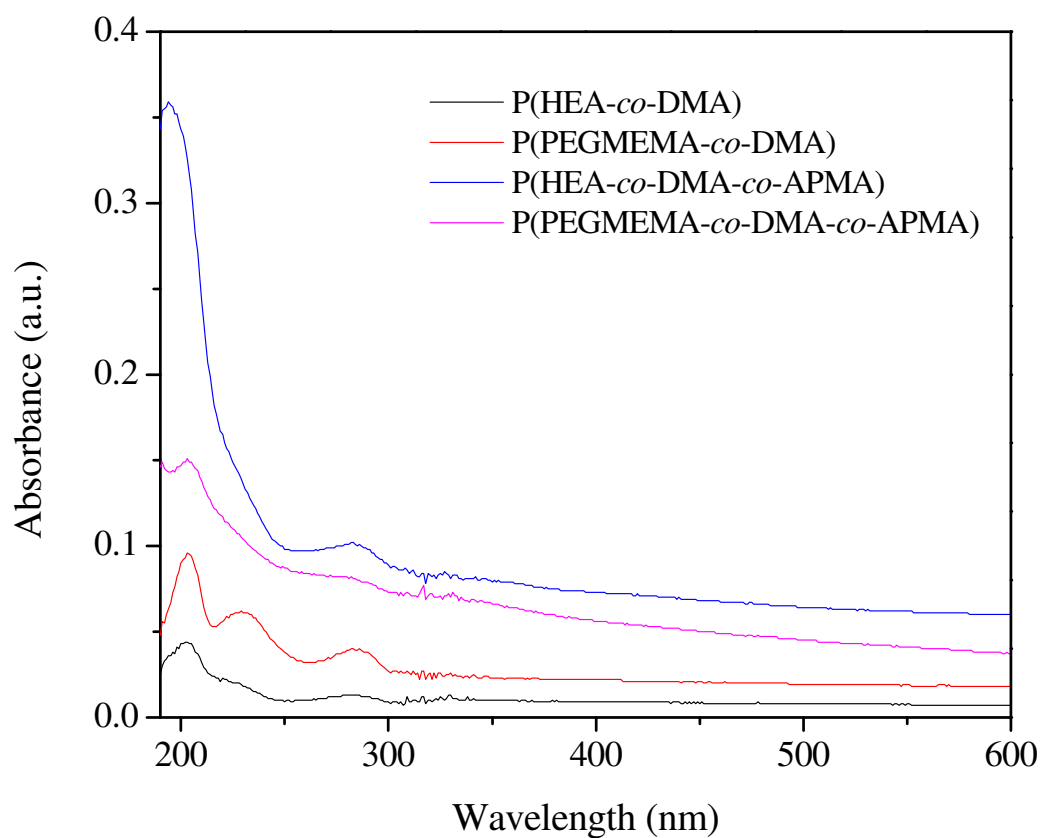

**Figure S6.** UV-Visible absorption spectra of the P(HEA-*co*-DMA) and P(PEGMEMA-*co*-DMA) copolymers- and the P(HEA-*co*-DMA-*co*-APMA) and P(PEGMEMA-*co*-DMA-*co*-APMA) terpolymers-coated quartz slides.

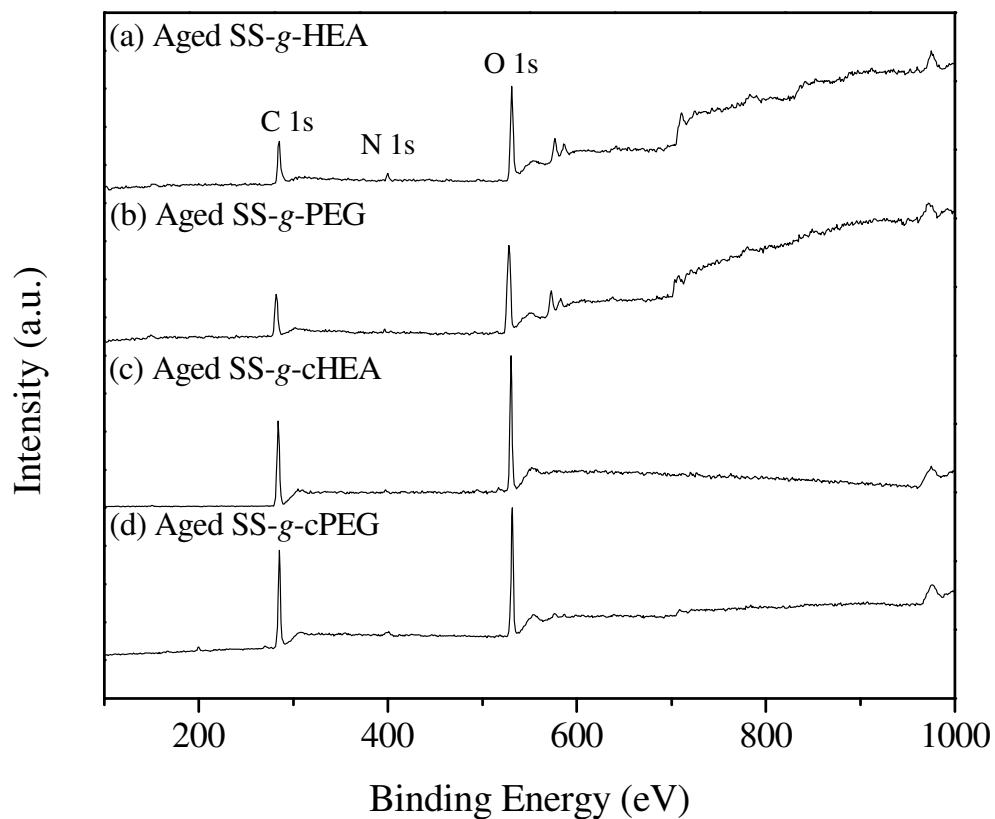

**Figure S7.** XPS wide-scan spectra of the aged (a) SS-g-HEA, (b) SS-g-PEG, (c) SS-g-cHEA and (d) SS-g-cPEG surfaces after exposure to the continuous stream of artificial seawater for 14 days. (The spectra are normalized to the maximum peak intensity.)



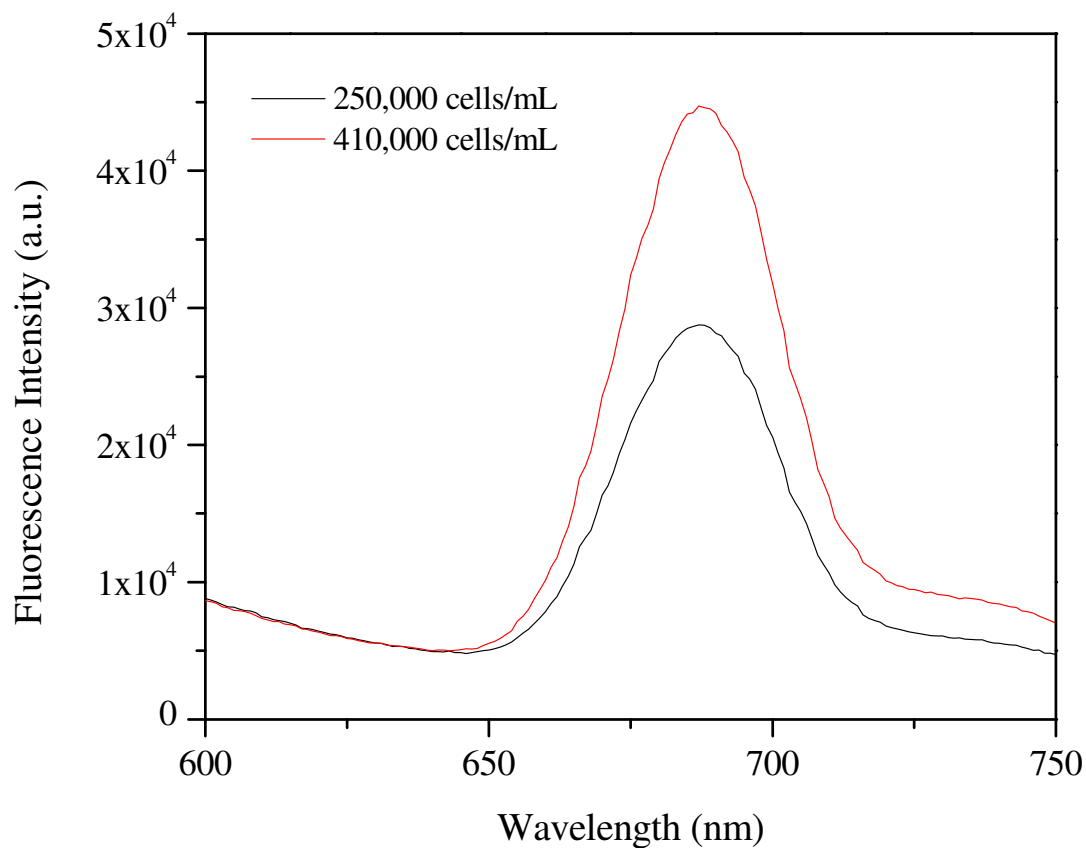

**Figure S8.** Fluorescence emission spectra of *Amphora* cells at an excitation wavelength ( $\lambda_{\text{ex}}$ ) of 440 nm. Since the *Amphora* cells exhibit a major emission peak centered at about 690 nm at an excitation wavelength ( $\lambda_{\text{ex}}$ ) of 440 nm, attributed to the autofluorescence of chlorophyll, the fluorescence technique can be employed to measure the concentration of ultrasonically removed *Amphora* cells.

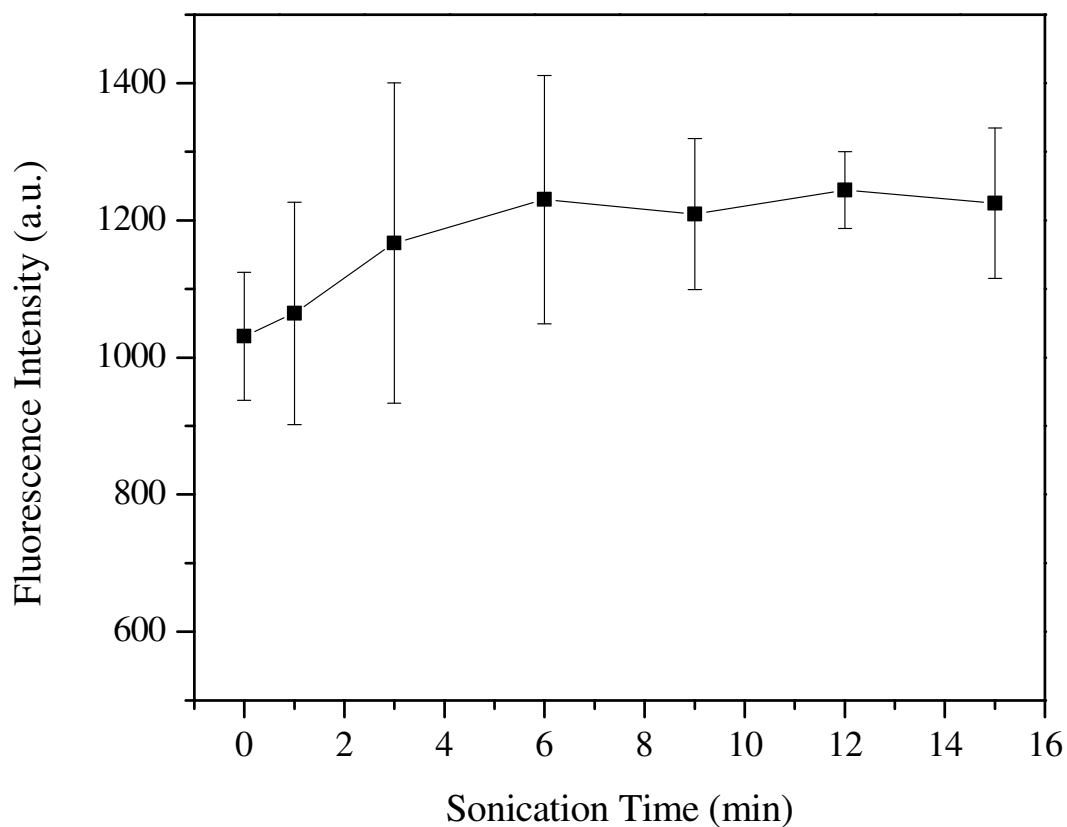

**Figure S9.** The evolution of fluorescence intensity of *Amphora* cells at 690 nm as a function of sonication time. The fluorescence intensity of *Amphora* cells increases slightly (~18%) with the increase in sonication time and reaches a plateau after about 6 min, suggesting that the ultrasonic treatment has only limited effect on the fluorescence intensity of *Amphora* cells. The enhancement in fluorescence intensity is probably due to better dispersion of the *Amphora* cells upon ultrasonic treatment.

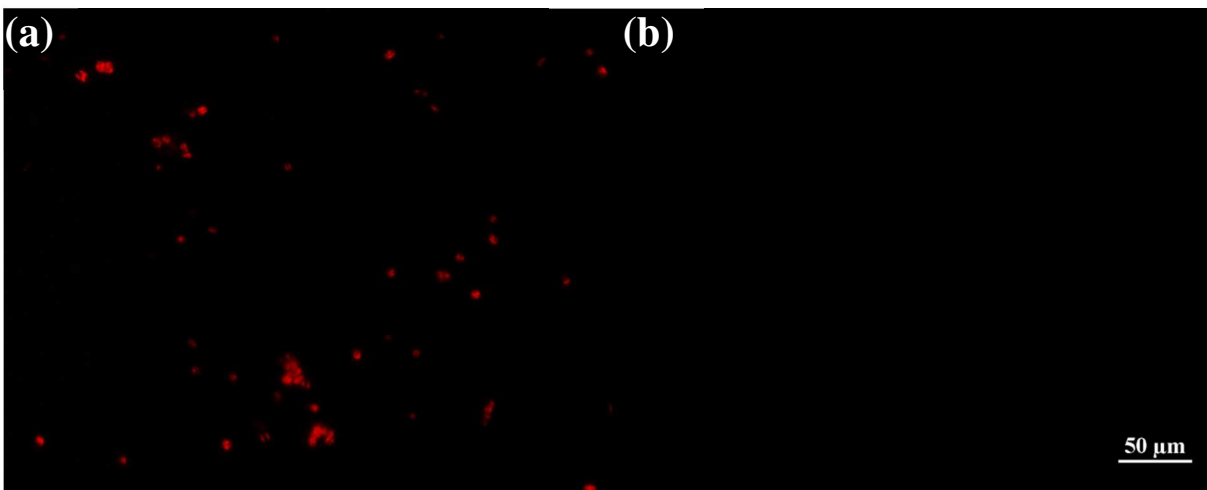

**Figure S10.** Fluorescence images of *Amphora* cells on pristine SS surfaces (a) before and (b) after ultrasonic treatment. The adherent *Amphora* cells on the substrates were viewed with a Nikon Eclipse Ti microscope, equipped with an excitation filter of 535 nm and an emission filter of 617 nm. A large numbers of *Amphora* cells were observed on the pristine SS surface, while almost no *Amphora* cell was visible on the surface after sonication for 10 min. This result confirms that the *Amphora* cells on the SS surface can be effectively dislodged by sonication.

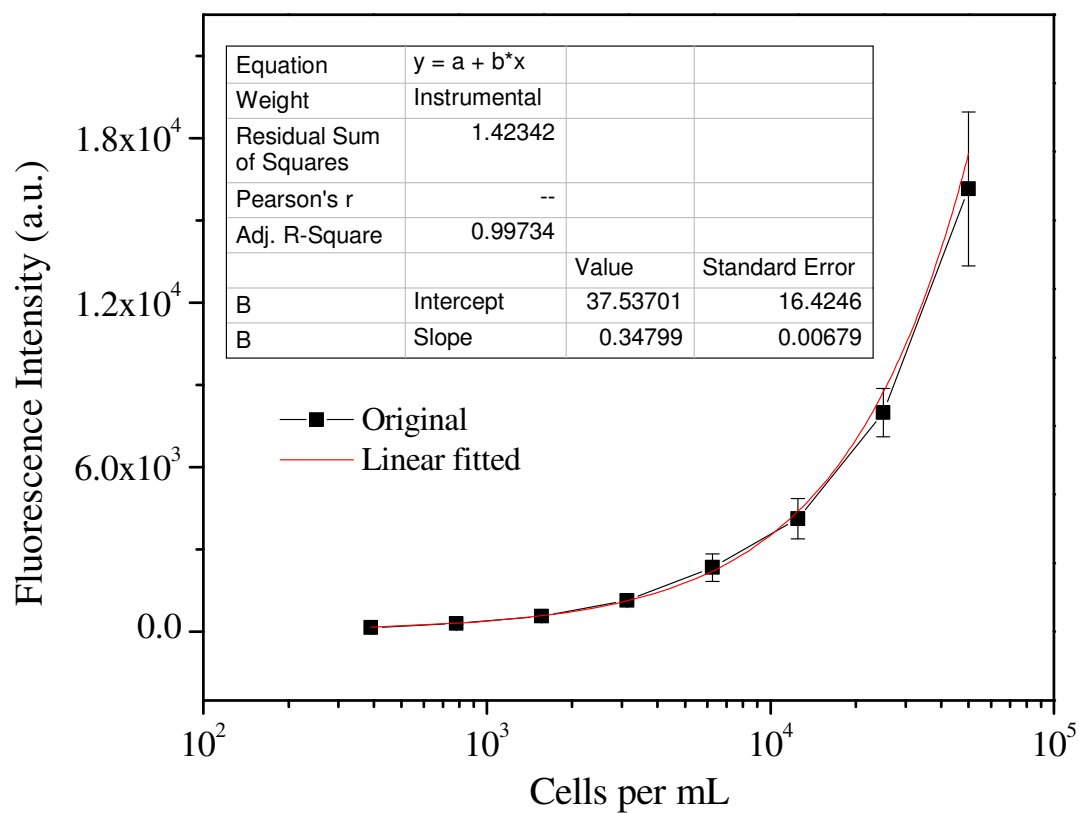

**Figure S11.** The plot and fitted curve of the number of *Amphora* cells versus the fluorescence intensity of the cells at 690 nm.
